# Supplementary material for: Protein lysine de-2-hydroxyisobutyrylation by CobB in prokaryotes
Source: PubMed Central journal article supplement — Sci Adv. 2019 Jul 17;5(7):eaaw6703. doi: 10.1126/sciadv.aaw6703 (PMC6636992; doi:10.1126/sciadv.aaw6703), 2019-07-17
Supplement: aaw6703_SM.pdf [file aaw6703_SM.pdf]

## Supplementary Materials for

### Protein lysine de-2-hydroxyisobutyrylation by CobB in prokaryotes

Hanyang Dong, Guijin Zhai, Cong Chen, Xue Bai, Shanshan Tian, Deqing Hu, Enguo Fan, Kai Zhang\*

\*Corresponding author. Email: kzhang@tmu.edu.cn

Published 17 July 2019, *Sci. Adv.* **5**, eaaw6703 (2019)

DOI: 10.1126/sciadv.aaw6703

#### The PDF file includes:

Fig. S1. Kinetic curves of enzymatic reaction.

Fig. S2. MS/MS spectrum of lysine-acylated peptides (YGDEQVKQWR) identified in *P. mirabilis*.

Fig. S3. MS/MS spectrum of 2-hydroxyisobutyrylated, acetylated, and succinylated peptides under different incubation conditions.

Fig. S4. Comparative analysis of Khib, Kac, and Ksucc in *P. mirabilis*.

Legends for tables S1 to S5

Table S6. The list of reagents, bacterial strains, and plasmids used in this paper.

#### Other Supplementary Material for this manuscript includes the following:

(available at [advances.sciencemag.org/cgi/content/full/5/7/eaaw6703/DC1](https://advances.sciencemag.org/cgi/content/full/5/7/eaaw6703/DC1))

Table S1 (Microsoft Excel format). The quantification result of H3K9hib and H3K9 probe enrichment in *P. mirabilis* protein lysate.

Table S2 (Microsoft Excel format). The identification result of Kac of *P. mirabilis*.

Table S3 (Microsoft Excel format). The identification result of Ksucc of *P. mirabilis*.

Table S4 (Microsoft Excel format). The quantification result of 2-hydroisobutyrylated proteomes with CobB KO *E. coli* and WT *E. coli*.

Table S5 (Microsoft Excel format). The PRM result of comparison of the quantities of K326ac and K343hib in T vector and CobB-overexpressing *P. mirabilis*.

## Supplementary Materials

### Figure Legends

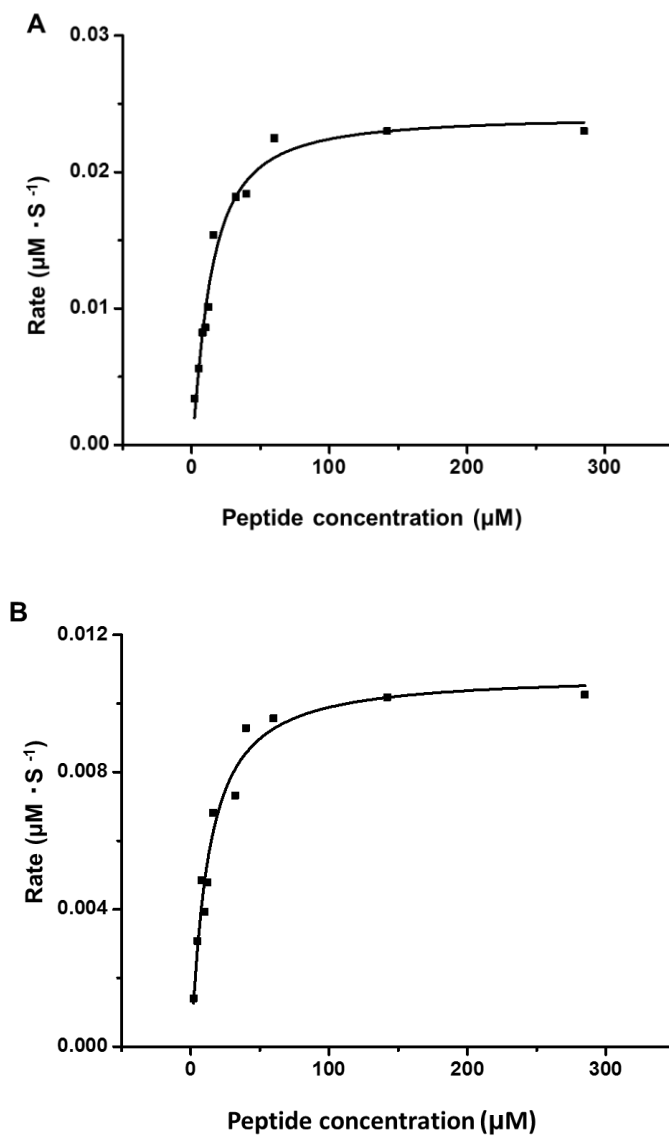

**Fig. S1**

**Fig. S1. Kinetic curves of enzymatic reaction.** (A) Drawing the kinetic curves of CobB by OriginPro 8. (B) Drawing the kinetic curves of mutated CobB (Y55F) by OriginPro 8.

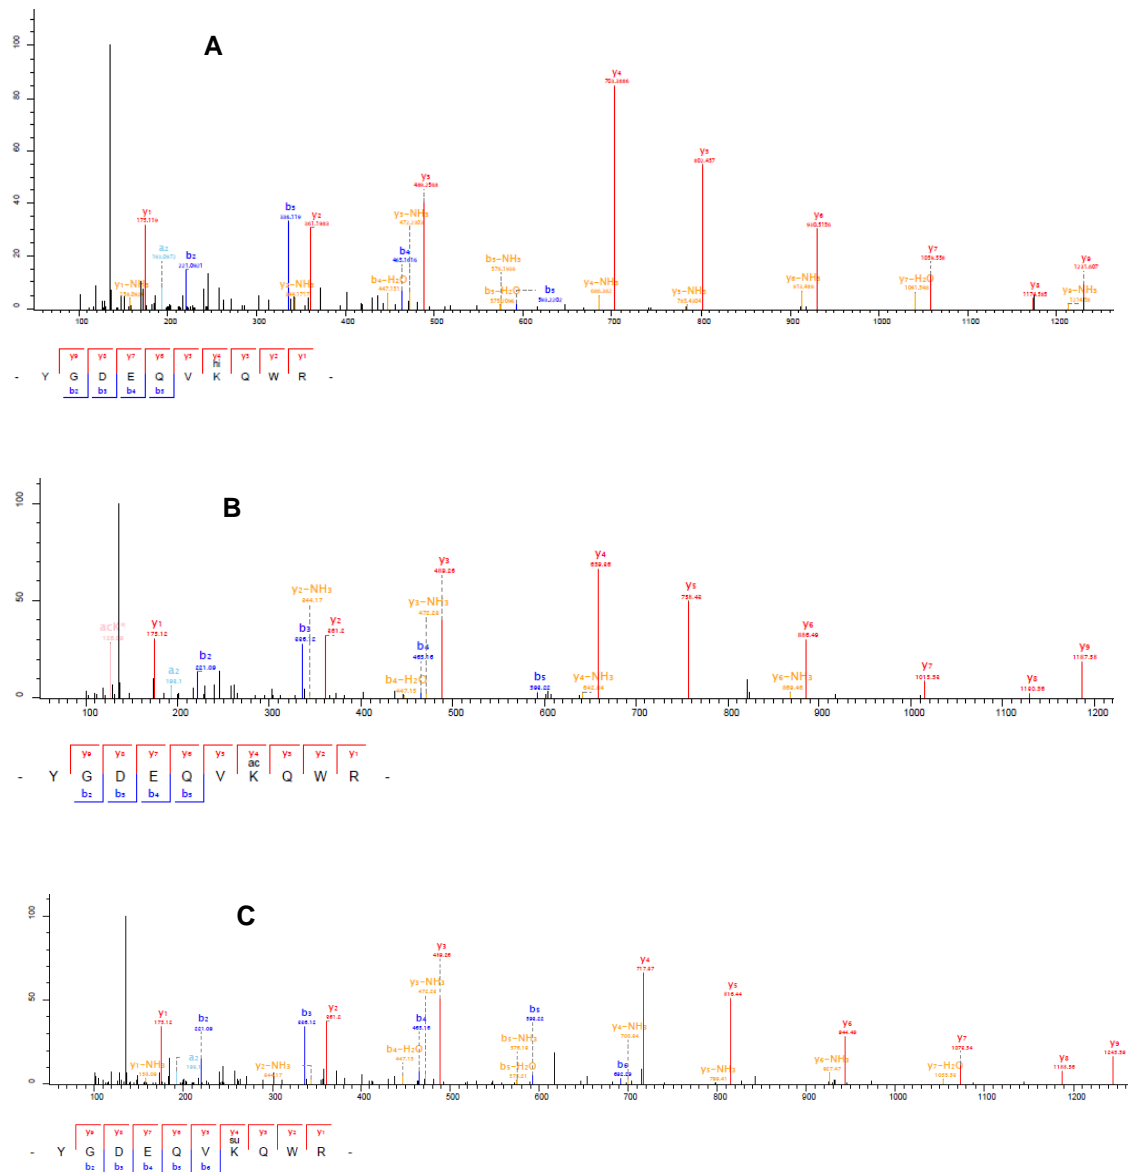

**Fig. S2**

**Fig. S2. MS/MS spectrum of lysine-acylated peptides (YGDEQVKQWR) identified in *P. mirabilis*. (A) MS/MS spectrum of YGDEQVK(hib)QWR. (B) MS/MS spectrum of YGDEQVK(ac)QWR. (C) MS/MS spectrum of YGDEQVK(succ)QWR.**

A

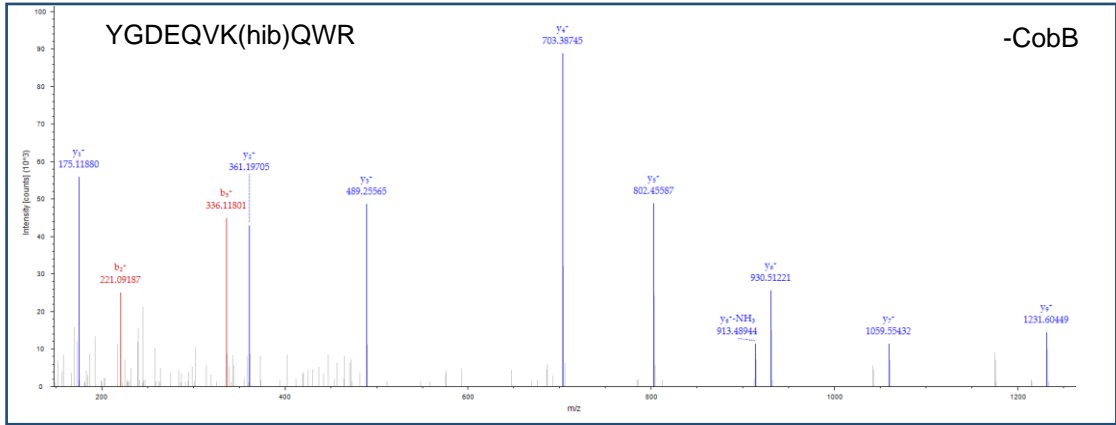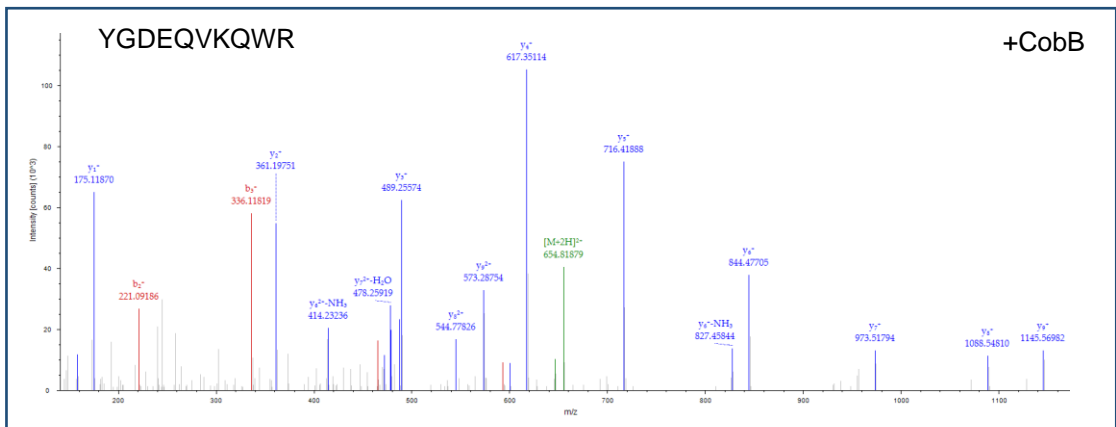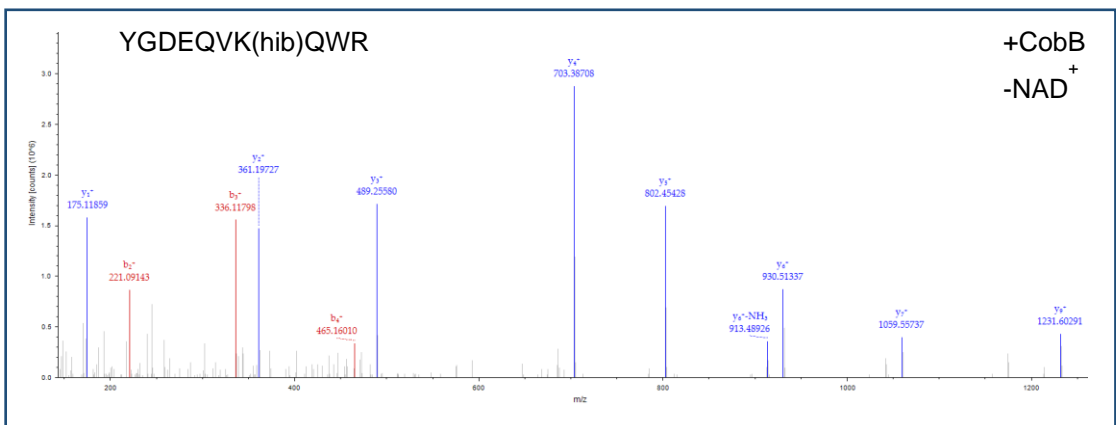

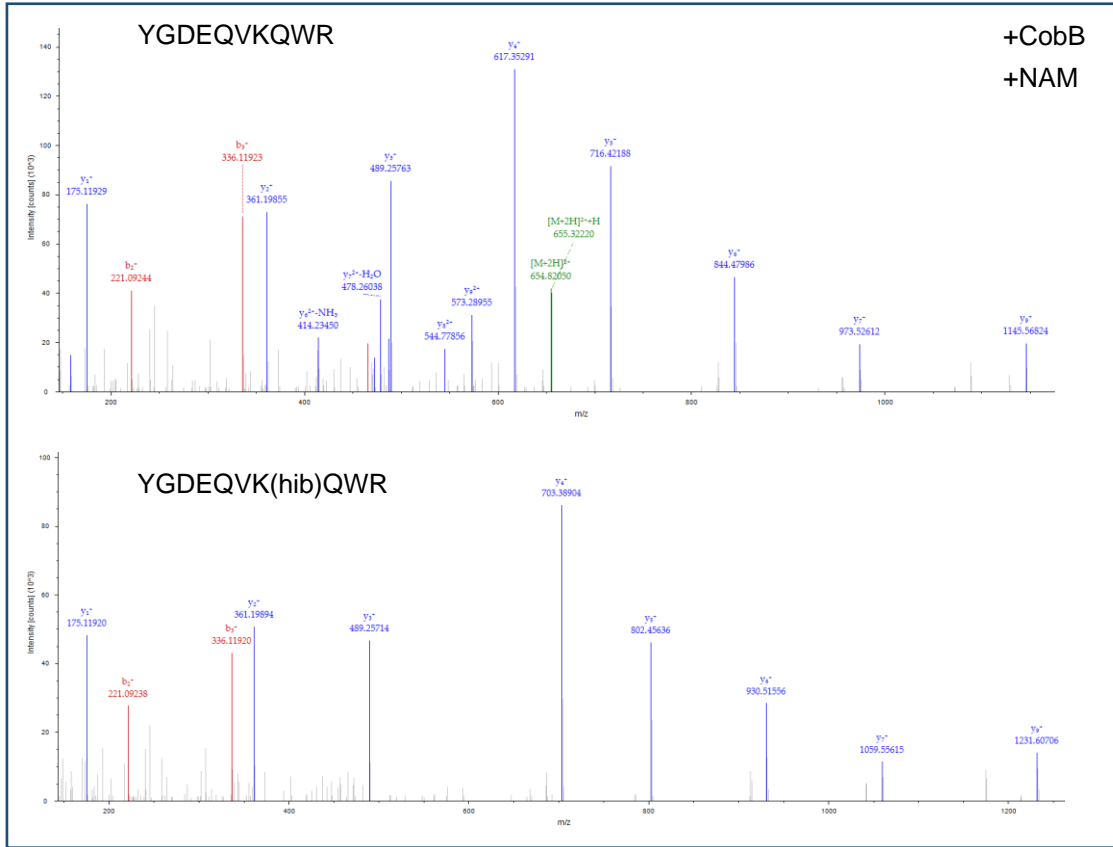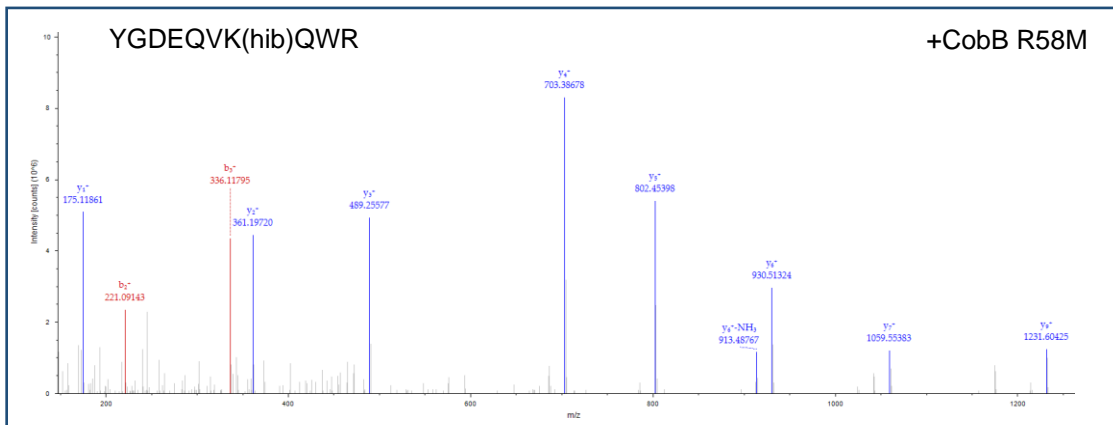

**B**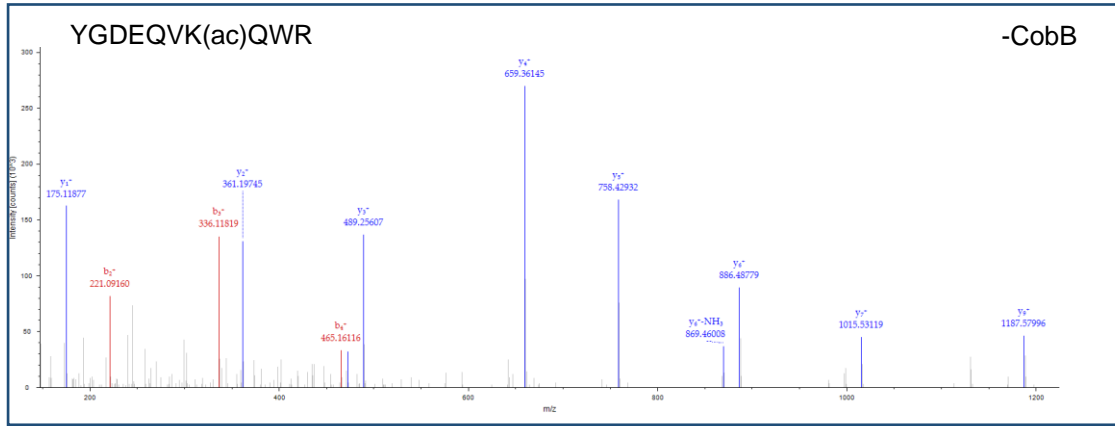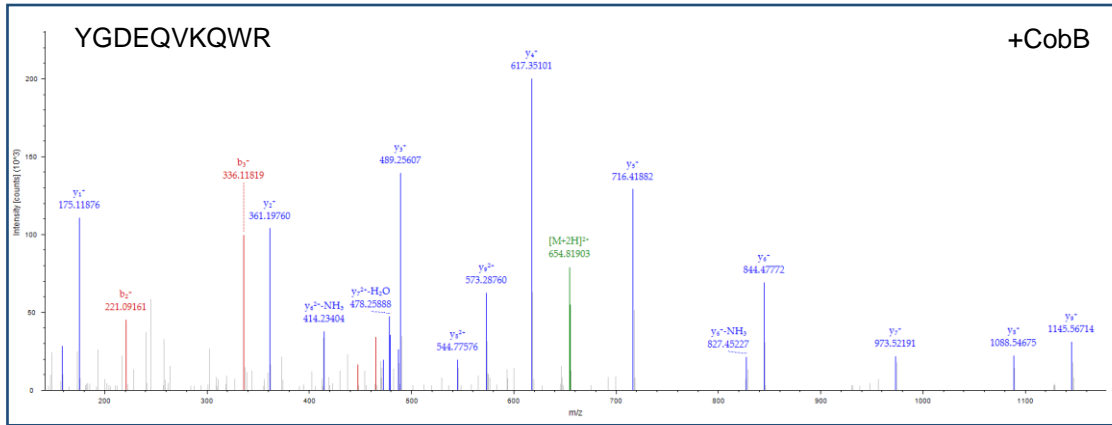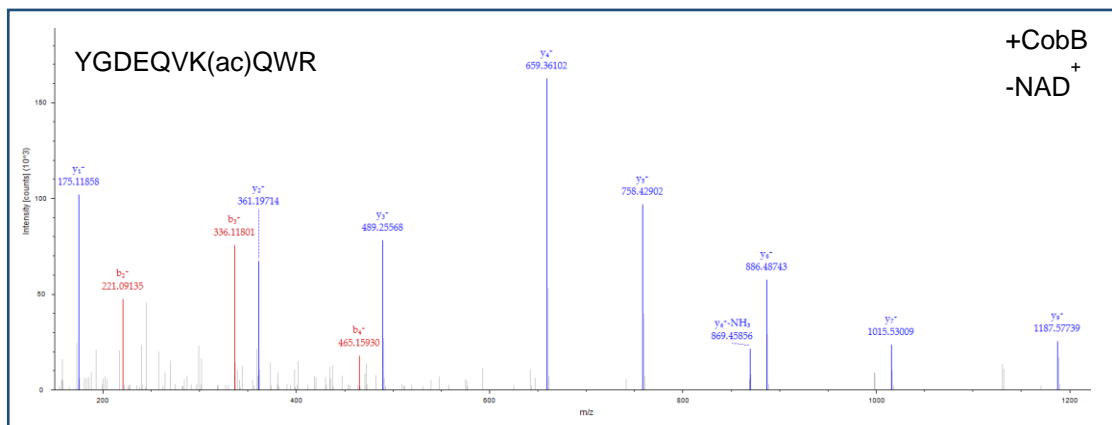

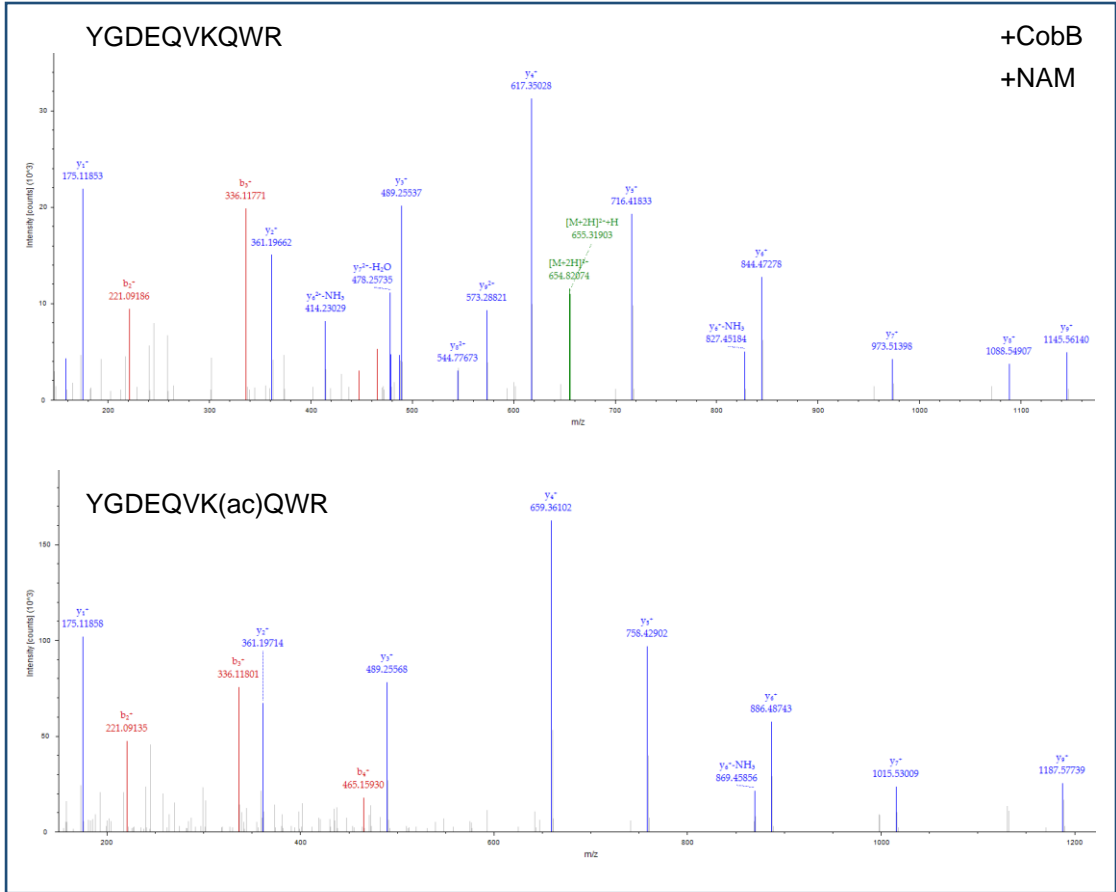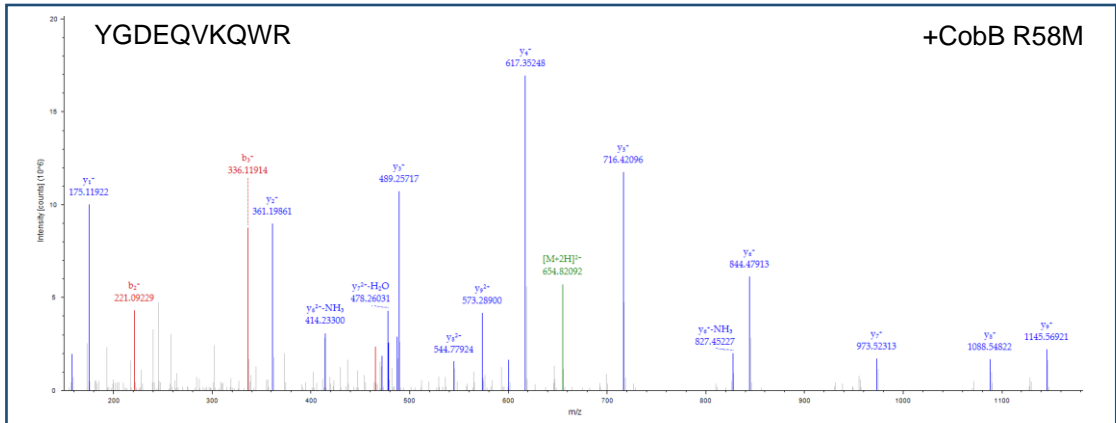

**C**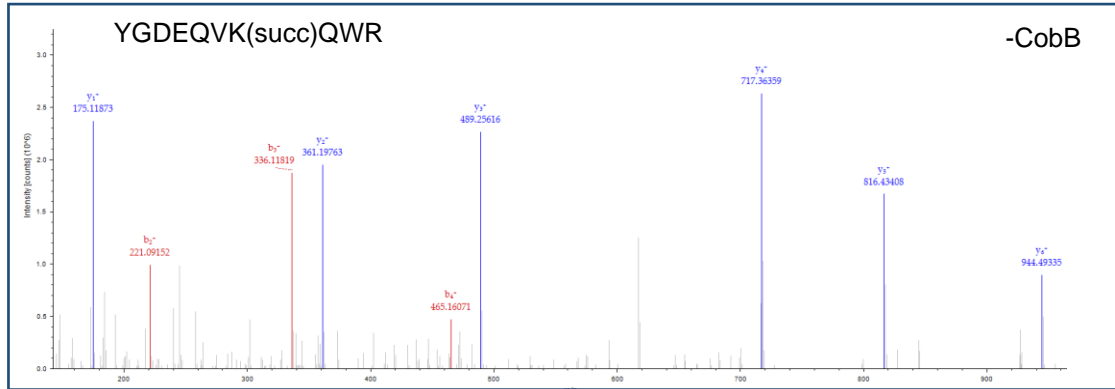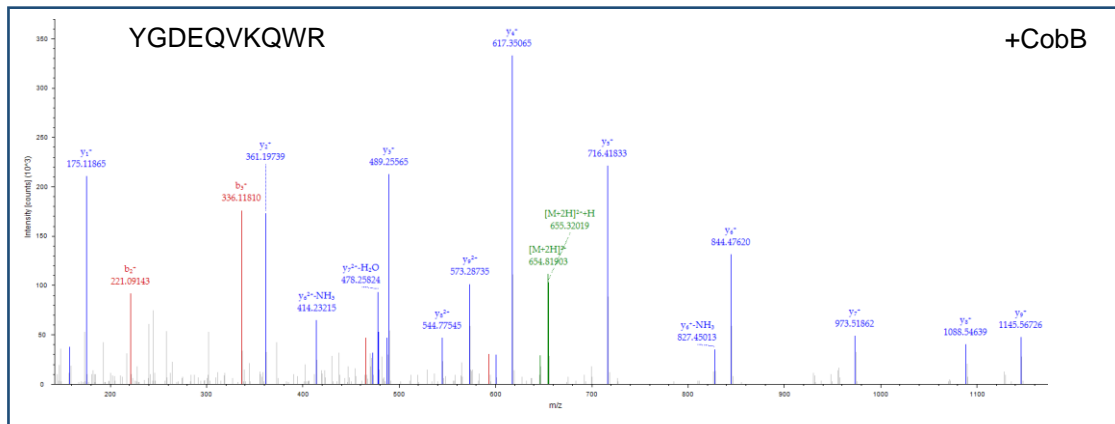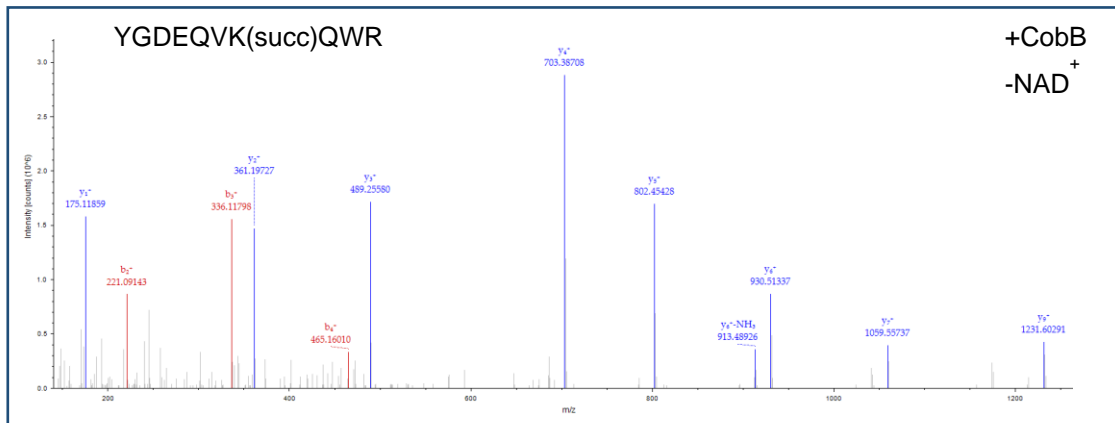



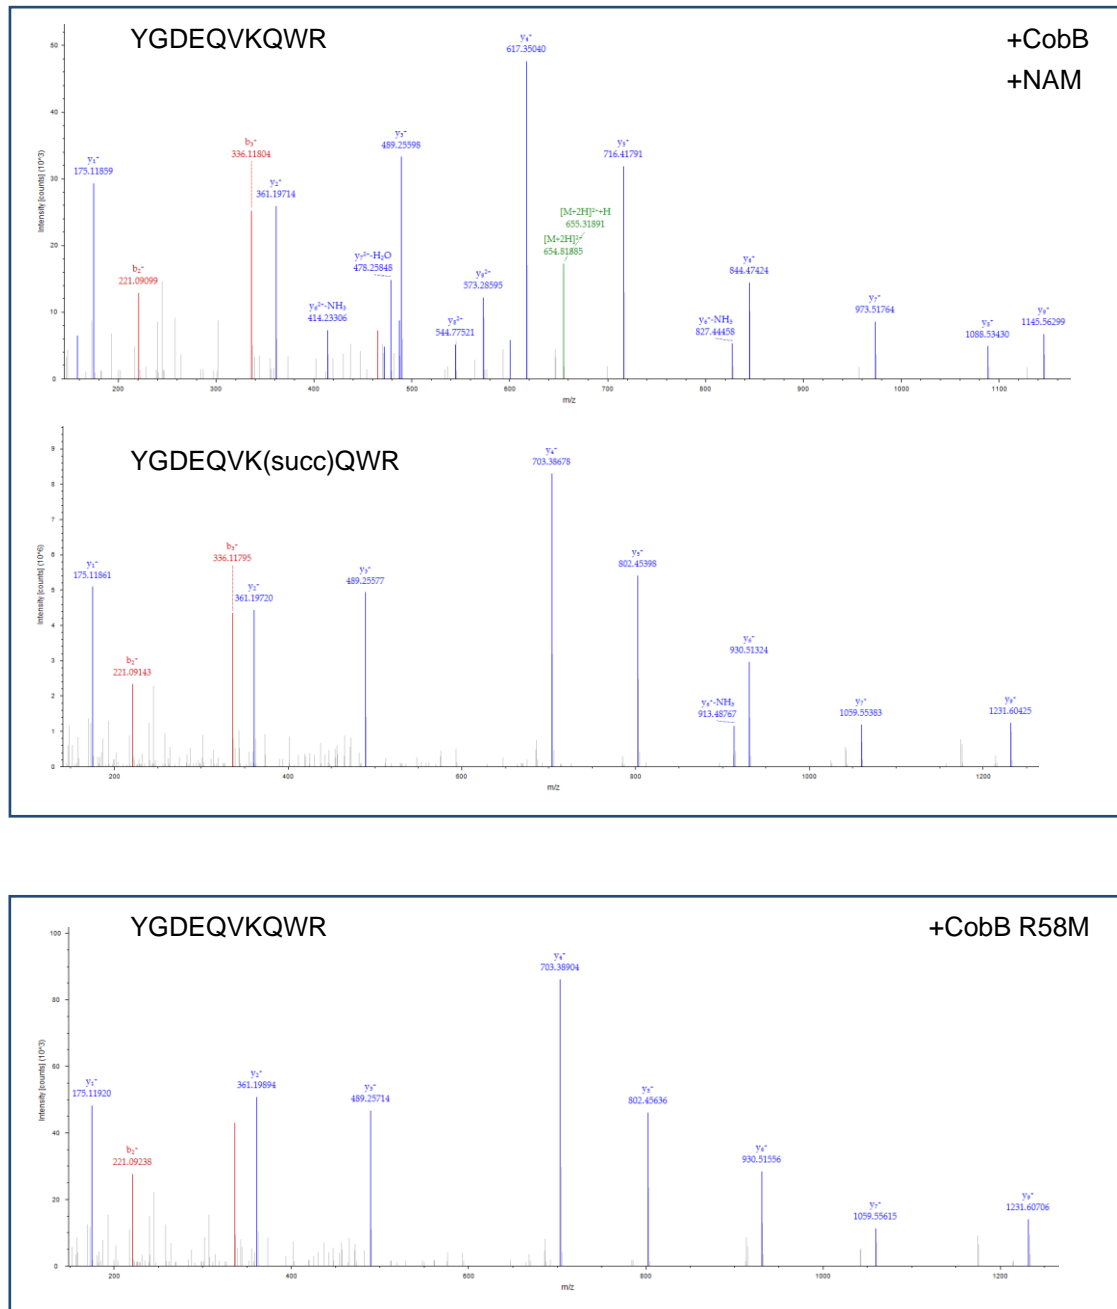

**Fig. S3**

**Fig. S3. MS/MS spectrum of 2-hydroxyisobutyrylated, acetylated, and succinylated peptides under different incubation conditions.** The incubation conditions contain: -CobB, +CobB, +CobB and -NAD<sup>+</sup>, +CobB and +NAM, +CobB R58M, +: presents existence, -: presents absence. (A) MS/MS spectrum present PD searching results of CobB and 2-hydroxyisobutyrylated

peptides incubation under different conditions. **(B)** MS/MS spectrum present PD searching results of CobB and acetylated peptides incubation under different conditions. **(C)** MS/MS spectrum present PD searching results of CobB and succinylated peptides incubation under different conditions.

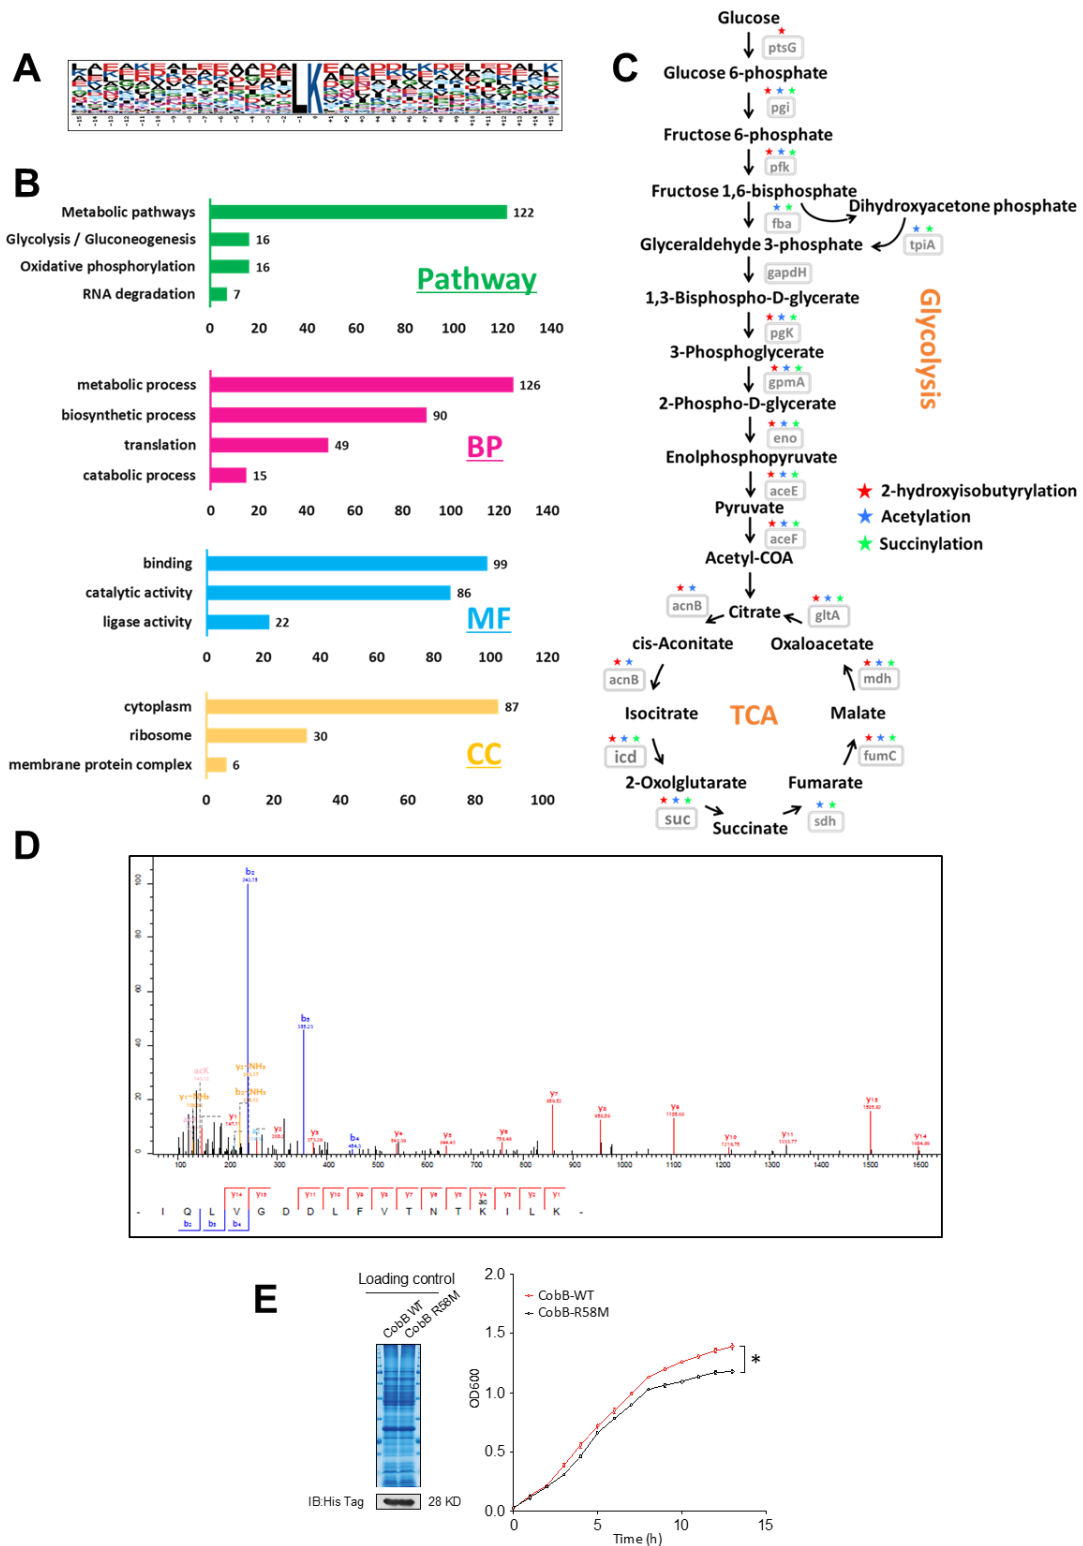

**Fig. S4**

**Fig. S4. Comparative analysis of Khib, Kac, and Ksucc in *P. mirabilis*.** (A) Sequence Logo representation of significant motifs of peptides detected three acylation identified by Motif-X software. The motifs with significance of  $p < 0.000001$  are shown. The motifs take acyllysine as center and show the distribution of 15 amino acids in both sides. (B) Analysis the biological

process, pathway, molecular function and cellular component of common acylated proteins in *P. mirabilis* by DAVID. (C) Khib, Kac and Ksucc enzymes in central metabolic network in *P. mirabilis*. (D) MS/MS Spectrogram of ENO peptide containing K326ac. (E). Measurement growth curve of WT CobB and mutated CobB overexpressing *P. mirabilis* that transformed CobB WT and mutation (R58M) vector.

**Table S1. The quantification result of H3K9hib and H3K9 probe enrichment in *P. mirabilis* protein lysate.**

**Table S2. The identification result of Kac of *P. mirabilis*.**

**Table S3. The identification result of Ksucc of *P. mirabilis*.**

**Table S4. The quantification result of 2-hydroisobutyrylated proteomes with CobB KO *E. coli* and WT *E. coli*.**

**Table S5. The PRM result of comparison of the quantities of K326ac and K343hib in T vector and CobB-overexpressing *P. mirabilis*.**

**Table S6. The list of reagents, bacterial strains, and plasmids used in this paper.**

**Table S6. The list of reagents, bacterial strains and plasmids used in this paper**

| REAGENT OR RESOURCE                                                | SOURCE                 | IDENTIFIER     |
|--------------------------------------------------------------------|------------------------|----------------|
| <b>Antibodies</b>                                                  |                        |                |
| Rabbit pan anti-2-hydroxyisobutyryllysine polyclonal antibody      | PTM Biolabs            | Cat# PTM-801   |
| Rabbit pan anti-acetyllysine polyclonal antibody                   | PTM Biolabs            | Cat# PTM-105   |
| Rabbit pan anti-succinyllysine polyclonal antibody                 | PTM Biolabs            | Cat# PTM-401   |
| Rabbit pan anti-malonyllysine polyclonal antibody                  | PTM Biolabs            | Cat# PTM-901   |
| Rabbit pan anti-glutaryllysine polyclonal antibody                 | PTM Biolabs            | Cat# PTM-1151  |
| Mouse pan anti-crotonyllysine monoclonal antibody                  | PTM Biolabs            | Cat# PTM-502   |
| Rabbit pan anti- $\beta$ -hydroxybutyryllysine polyclonal antibody | PTM Biolabs            | Cat# PTM-1201  |
| Anti-acetyllysine antibody beaded agarose                          | PTM Biolabs            | Cat# PTM-104   |
| Anti-succinyllysine antibody conjugated agarose beads              | PTM Biolabs            | Cat# PTM-402   |
| 6 $\times$ His tag antibody (His. H8)                              | Thermo Fisher          | Cat# MA1-21315 |
| <b>Bacterial Strains and Plasmids</b>                              |                        |                |
| <i>Proteus mirabilis</i> ATCC29906                                 | University of Lodz     | N/A            |
| BL21 (DE3) competent cells                                         | TIANGEN                | Cat# CB105     |
| DH5 $\alpha$ competent cells                                       | TIANGEN                | Cat# CB101     |
| <i>Escherichia coli</i> MG1655                                     | Tolo Biotech           | N/A            |
| npdA KO <i>Escherichia coli</i> MG1655                             | Tolo Biotech           | N/A            |
| pET28a vector                                                      | Solarbio               | Cat# P3110     |
| pTrc99a vector                                                     | addgene                | KL-ZL-0193     |
| pGEM-T Easy Vector                                                 | Promega                | Cat# A1360     |
| <b>Synthetic Peptides</b>                                          |                        |                |
| ARTKQTAR-K(hib)-STGGKAC                                            | SciLight Biotechnology | N/A            |
| YGDEQV-K(hib)-QWR                                                  | SciLight               | N/A            |

|                                                                            |                           |     |
|----------------------------------------------------------------------------|---------------------------|-----|
|                                                                            | Biotechnology             |     |
| GIANSILI-K(hib)-FNQIGSLTETLAAIK                                            | SciLight<br>Biotechnology | N/A |
| YGDEQV-K(ac)-QWR                                                           | SciLight<br>Biotechnology | N/A |
| IQLVGDDLFTNT-K(ac)-ILK                                                     | SciLight<br>Biotechnology | N/A |
| YGDEQV-K(succ)-QWR                                                         | SciLight<br>Biotechnology | N/A |
| ARTKQTARKSTGGKAC                                                           | SciLight<br>Biotechnology | N/A |
| <b>PCR Primers</b>                                                         |                           |     |
| ENO-pET28a-F:<br>cgcggatcctccAAAATCGTTAAAG                                 | Reported                  | N/A |
| ENO-pET28a-R:<br>CCGCTCGAGTTATGCTTGGCCTTTA<br>ACTTC                        | Reported                  | N/A |
| ENO-K343T-pET28a-F:<br>CTAACTCTATCCTGATCACATTCAAC<br>CAA                   | Reported                  | N/A |
| ENO-K343T-pET28a-R:<br>GTGATCAGGATAGAGTTAGCAATAC<br>CTTT                   | Reported                  | N/A |
| ENO-K326Q-pET28a-F:<br>TTGTA ACTAATACTCAGATCCTAAA<br>AGAAG                 | This paper                | N/A |
| ENO-K326Q-pET28a-R:<br>GAGTATTAGTTACAAACAGGTCGTC                           | This paper                | N/A |
| ENO-His-T vector-F:<br>ACGCGTCGACGGATATGTGAGAAG<br>AG                      | This paper                | N/A |
| ENO-His-T vector-R:<br>CATGCATGCTTATGCGTGGTGGTGG<br>TGGTGGTGTGGCCTTTAACTTC | This paper                | N/A |
| ENO-K343T-T vector-F:<br>CTAACTCTATCCTGATCACATTCAAC<br>CAA                 | This paper                | N/A |
| ENO-K343T-T vector-R:<br>GTGATCAGGATAGAGTTAGCAATAC<br>CTTT                 | This paper                | N/A |

|                                                                          |            |     |
|--------------------------------------------------------------------------|------------|-----|
| ENO-K326Q-T vector-F:<br>TTGTA ACTAATACTCAGATCCTAAA<br>AGAAG             | This paper | N/A |
| ENO-K326Q-T vector-R:<br>GAGTATTAGTTACAAACAGGTCGTC                       | This paper | N/A |
| npdA-pET28a-F:<br>CGCGGATCCAATTTACCCAAAGTAG<br>TG                        | This paper | N/A |
| npdA-pET28a-R:<br>CCGCTCGAGTTATTGCGTCAAATCA<br>GCTTTAG                   | This paper | N/A |
| npdA-Y94F-pet28a-F:<br>AGCTGGTTCAGCAGTTTTTCAATGA<br>GCGCC                | This paper | N/A |
| npdA-Y94F-pet28a-R:<br>AAAAACTGCTGAACCAGCTTAGGG<br>TTGCG                 | This paper | N/A |
| npdA-R97M-pet28a-F:<br>TTCAGCAGTTTTACAATGAGATGCG<br>TCGTCAATTA           | This paper | N/A |
| npdA-R97M-pet28a-R:<br>CATCTCATTGTAAAACCTGCTGAACC<br>AGCTTAGGGT          | This paper | N/A |
| npdA-His-T vector-F:<br>ACGCGTCGACAACCTTCGTCATCGTC<br>GGCTTAGGAAGTTTC    | This paper | N/A |
| npdA-His-T vector-R:<br>CATGCATGCTTAGTGGTGGTGGTGG<br>TGGTGTTGCGTCAAATCAG | This paper | N/A |
| npdA-His-pTrc99a-F:<br>CGCGGATCCATGAAACTTAAACTTC<br>GTCATCGTCGG          | This paper | N/A |
| npdA-His-pTrc99a-R:<br>GCTCTAGATTAGTGGTGGTGGTGGT<br>GGTGTTGCGTCAAATCAG   | This paper | N/A |
| npdA-R58M-pTrc99a-F:<br>TTCAGCAGTTTTACAATGAGATGCG<br>TCGTCAATTA          | This paper | N/A |

|                                                                |                      |             |
|----------------------------------------------------------------|----------------------|-------------|
| npdA-R58M-pTrc99a-R:<br>CATCTCATTGTAAACTGCTGAACC<br>AGCTTAGGGT | This paper           | N/A         |
| <b>Reagent</b>                                                 |                      |             |
| HisPur Ni-NTA Resin                                            | Thermo<br>SCIENTIFIC | Cat# 88221  |
| Fast Mutagenesis System                                        | TRANS                | Cat# FM111  |
| PEP Colorimetric/Fluorometric Assay Kit                        | SIGMA-ALDRIC<br>H    | Cat# MAK102 |
| SILAC <sup>TM</sup> L-Lysine HCL                               | Invitrogen           | 32461       |
| U- <sup>13</sup> C <sub>6</sub> -L-Lysine HCL                  | Invitrogen           | 32457       |
